# Supplementary material for: Realization of an anion insertion mechanism for high-rate electrochemical energy storage in highly crystalline few-layered potassium manganese dioxide nanosheets
Source: Royal Society of Chemistry journal article supplement (doi:10.1039/d1ta10587f), 2022-01-01
Supplement: d1ta10587f1.pdf [file d1ta10587f1.pdf]

Supplementary Information For

**Realization of Anion Insertion Mechanism for High-Rate  
Electrochemical Energy Storage in High Crystallinity Few-  
layer Potassium Manganese Dioxide Nanosheets**

Yifan Zhang<sup>ab</sup>, Shicong Zhang<sup>bc</sup>, Zhang Chen<sup>a</sup>, Tao Li<sup>c</sup>, Yaoyao Zhao<sup>b</sup>, Fuqiang Huang<sup>\*b</sup>,  
and Tianquan Lin<sup>\*c</sup>

<sup>a</sup> School of Materials Science and Engineering, Shanghai University, Shanghai 200444,  
China

<sup>b</sup> State Key Laboratory of High Performance Ceramics and Superfine Microstructure,  
Shanghai Institute of Ceramics, Chinese Academy of Sciences, Shanghai, 200050, PR  
China

<sup>c</sup> School of Materials Science and Engineering, Shanghai Jiao Tong University, 800  
Dongchuan Road, Shanghai, 200240

## Electrochemical Data

For a nonlinear Faradaic capacitor, the capacitance is obtained from the integrated form

$$C = \frac{\int dQ}{\int dV} \quad (1)$$

In the above,  $Q$  is the charge during the CV/GCD charging or discharging cycle, and  $V$  is the potential. In GCD test, since  $I$  is set constant, so the equation reduces to

$$C = \frac{\int dQ}{\int dV} = \frac{I\Delta t}{\Delta V} \quad (2)$$

In the above, the  $\Delta t$  is the charging or discharging time, and  $\Delta V$  is the potential window. The specific capacitance is the capacitance divided by the mass of the electrode

$$C = \frac{I}{m(\Delta V/\Delta t)} \quad (3)$$

The volumetric capacitance is likewise obtained by dividing capacitance by the volume of the electrode.

The rate independent current and diffusion-limited current are evaluated through Eq (4)<sup>1</sup>, we write

$$i = k_1 v + k_2 v^{1/2} \quad (4)$$

Where the two terms arise from the rate-independent component and the diffusion-limited component of capacitance, respectively. Surface capacitive contribution can be calculated by this equation.

## EQCM Data

The change of Sauerbrey mass converts into the frequency change of the quartz crystal by Sauerbrey's equation<sup>2</sup> through Dfind software (Biolin Scientific AB, Sweden).

$$m_f = -\frac{c}{n} \Delta f_n \quad (5)$$

In the above,  $c$  is a constant related to crystal sensitivity factors,  $n$  is the frequency

multiplier, and  $\Delta f_n$  is the change of n frequency multiplication. For the quartz sensor with the reference harmonic frequency of 5 MHz we used, C is 17.7 ng Hz<sup>-1</sup> cm<sup>-2</sup>. In this study, the Sauerbrey mass was all calculated through three frequency multiplication, and the area is 0.785 cm<sup>2</sup> (a circle with a diameter of 10 mm). The equation can be written as Eq (6)

$$m_f = -4.6315 \Delta f_3 \text{ (ng)} \quad (6)$$

The exchanged molecular weight of ion ( $M_w$ , g/mol e<sup>-</sup>) converts the change of Sauerbrey mass and the change of charge at the same time. The equation can be written as Eq (7)

$$M_w = F \frac{dm_f}{dQ} \quad (7)$$

In the above,  $F$  is Faraday constant, which is 96485 C mol<sup>-1</sup>. The  $dm_f/dQ$  can be calculated by Sauerbrey mass vs. charge plot.

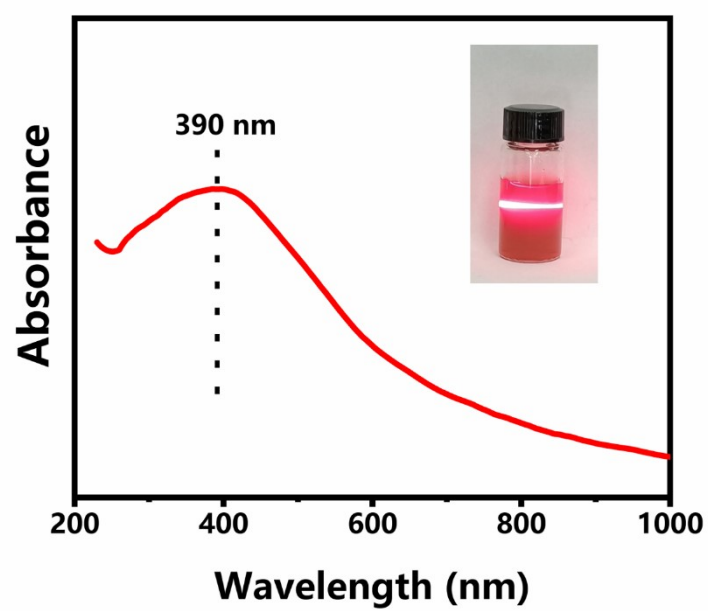

**Fig. S1** UV-vis spectra of NS-KMnO and photograph of the Tynall phenomenon (insert).

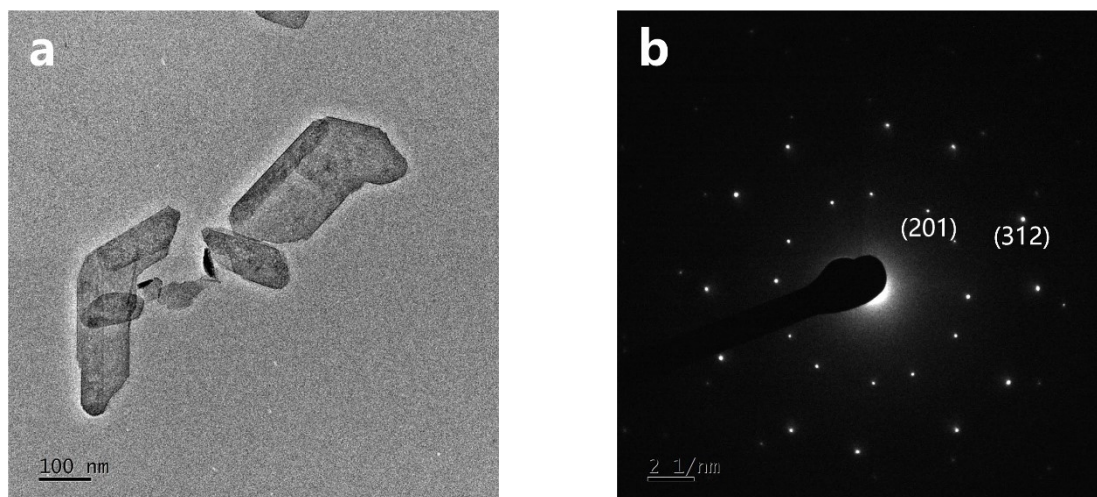

**Fig. S2** TEM image (a) of NS-KMnO and corresponding SAED patterns(b). There are two sets of identical diffraction spots, indicating double-layer nanosheet.

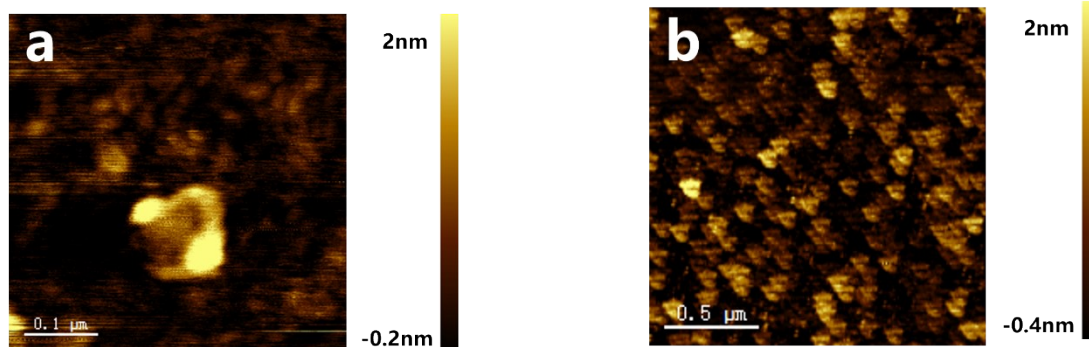

**Fig. S3** AFM images of NS-KMnO. The range of thickness is from 0.5 to 3 nm, which the range of layer is from 1 to 5.

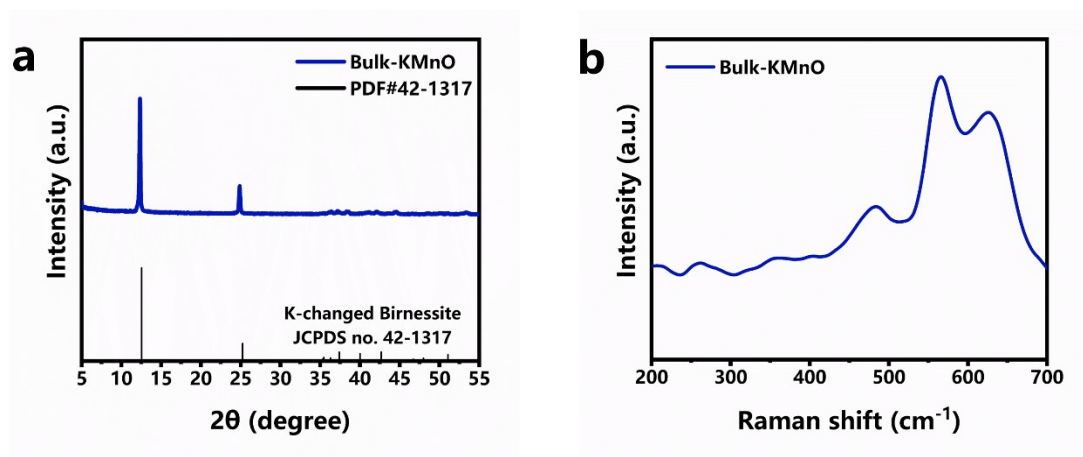

**Fig. S4** Structure Characterization of Bulk-KMnO. (a) XRD patterns of Bulk-KMnO (blue line) and JCPDS no. 42-1317 (black line). (b) Raman scattering spectra of Bulk-KMnO. There are no other peaks except the Mn-O stretching vibration.

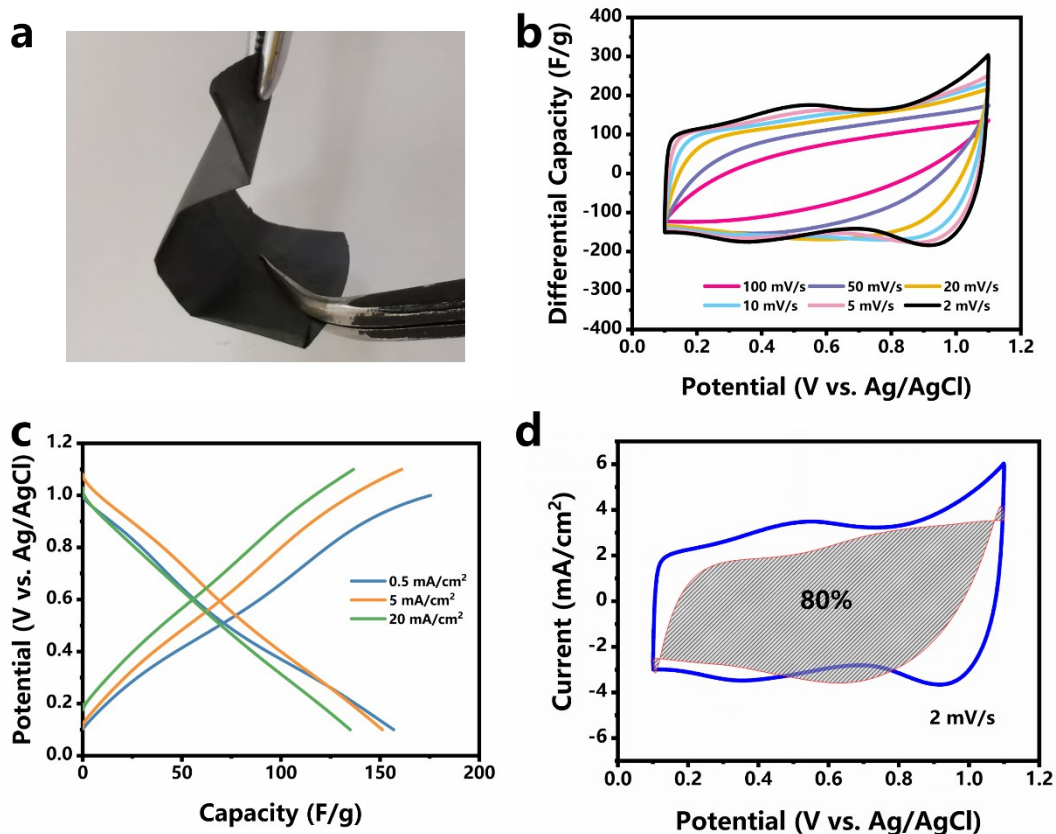

**Fig. S5** Electrochemical Characterization of NS-KMnO. (a) Photographs showing flexible NS-KMnO@SWCNTs electrode. (b) CV curves of NS-KMnO with mass loading of  $9.9 \text{ mg/cm}^2$  at scan rates of 2-100  $\text{mV/s}$ . Here, current is normalized by scan rate  $v$ . (c) CC curves of NS-KMnO with mass loading of  $9.9 \text{ mg/cm}^2$  at different current densities of 0.5-20  $\text{mA/cm}^2$ . (d) CV curve of NS-KMnO with mass loading of  $9.9 \text{ mg/cm}^2$  with shadowed area representing the surface capacitive contribution.



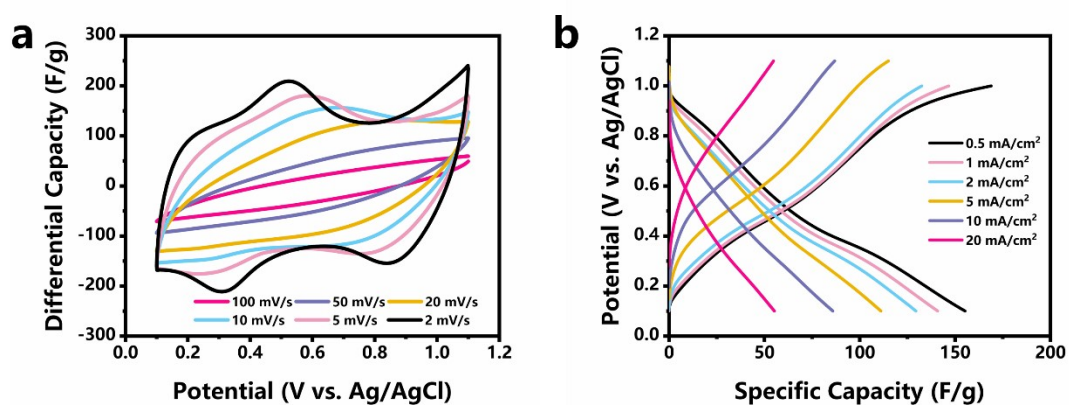

**Fig. S6** Electrochemical Characterization of Bulk-KMnO with mass load of  $9.7 \text{ mg cm}^{-2}$ .  
 (a) CV curves at scan rates of 2-100  $\text{mV s}^{-1}$ . Here, current is normalized by scan rate  $v$ .  
 (b) CC curves at different current densities of 0.5-20  $\text{mA cm}^{-2}$ .

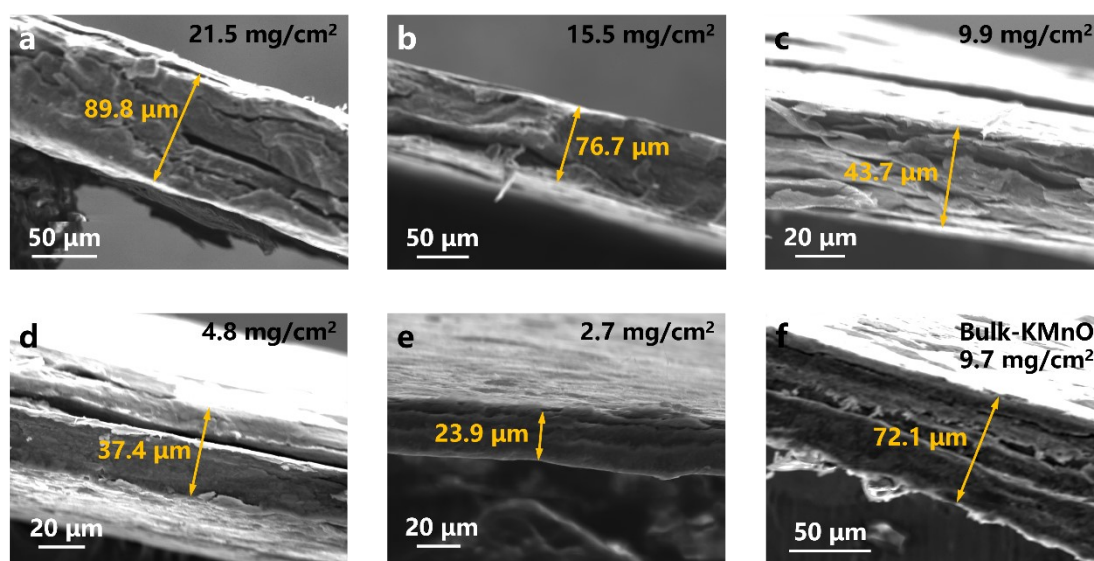

**Fig. S7** SEM images of electrode with different mass loading. (a-e) NS-KMnO with mass loading from 21.5 to 2.7 mg cm<sup>-2</sup>, and the thickness is marked by yellow words. (f) Bulk-KMnO with mass loading of 9.7 mg cm<sup>-2</sup>, and the thickness is marked by yellow words.

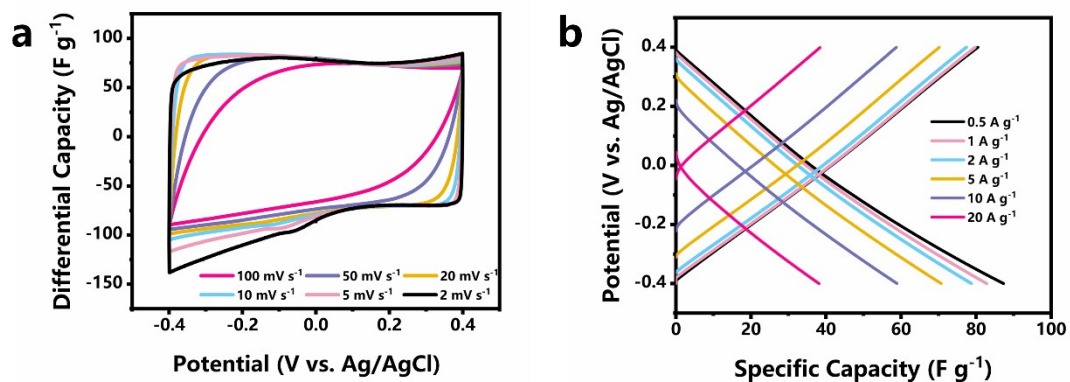

**Fig. S8** Electrochemical characterization of YP-50 in three-electrode electrochemical cells. (a) CV curves at scan rates of 2-100  $\text{mV s}^{-1}$ . Here, current is normalized by scan rate  $v$ . (b) CC curves at different current densities of 0.5-20  $\text{A g}^{-1}$ .

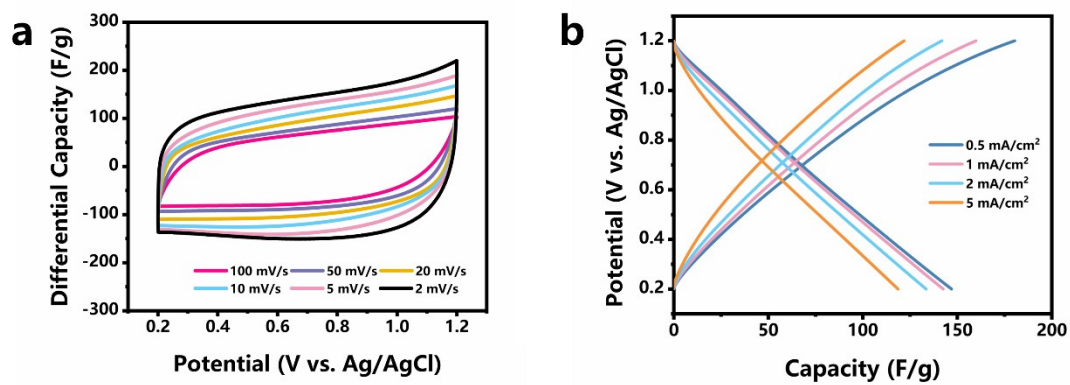

**Fig. S9** Electrochemical Characterization of YP-50 electrode in three . (a) CV curves at scan rates of 2-100  $\text{mV s}^{-1}$ . Here, current is normalized by scan rate  $v$ . (b) CC curves at different current densities of 0.5-20  $\text{mA cm}^{-2}$ .

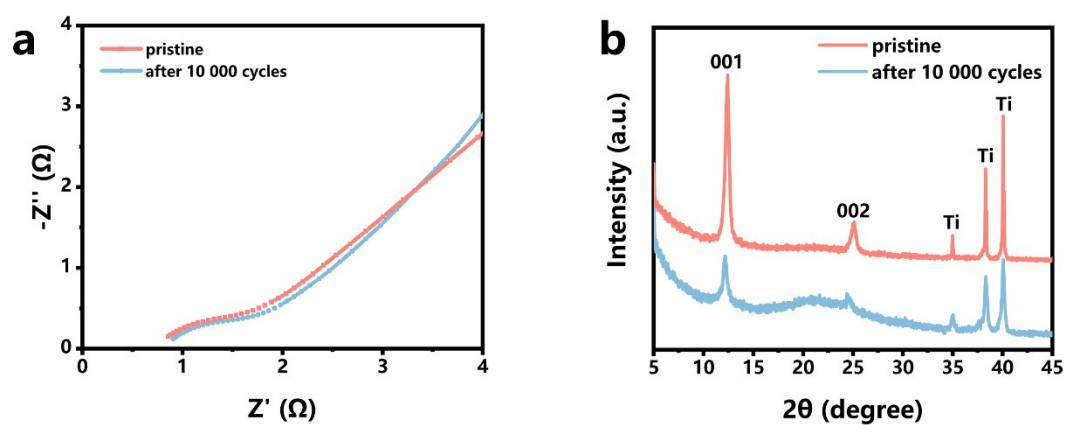

**Fig. S10** Failure mechanism analysis. (a) Nyquist plot of NS-KMnO//YP-50 asymmetric supercapacitor at pristine (pink line) and after 10,000 cycles (blue line). It shows a little change in the structure of electrode. (b) XRD patterns of NS-KMnO electrode at pristine (pink line) and after 10,000 cycles (blue line). The crystallinity was reduced after 10,000 cycles.

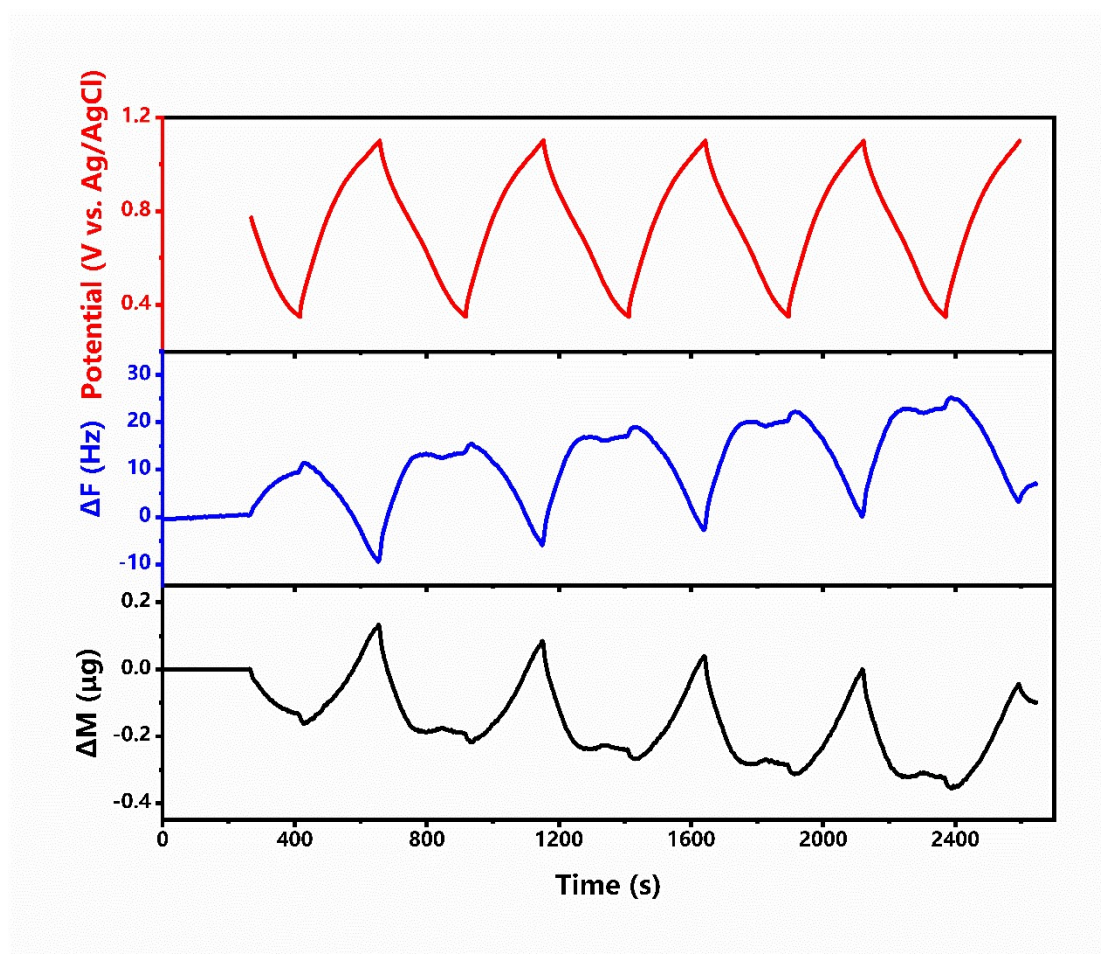

**Fig. S11** EQCM analyses of NS-KMnO-coated quartz electrode in 0.5 M  $\text{K}_2\text{SO}_4$  solution. Here, the changes of potential (red), frequency (blue), and Sauerbrey mass (black) in five cycles are similar, and there is only anion migration during charging and discharging.

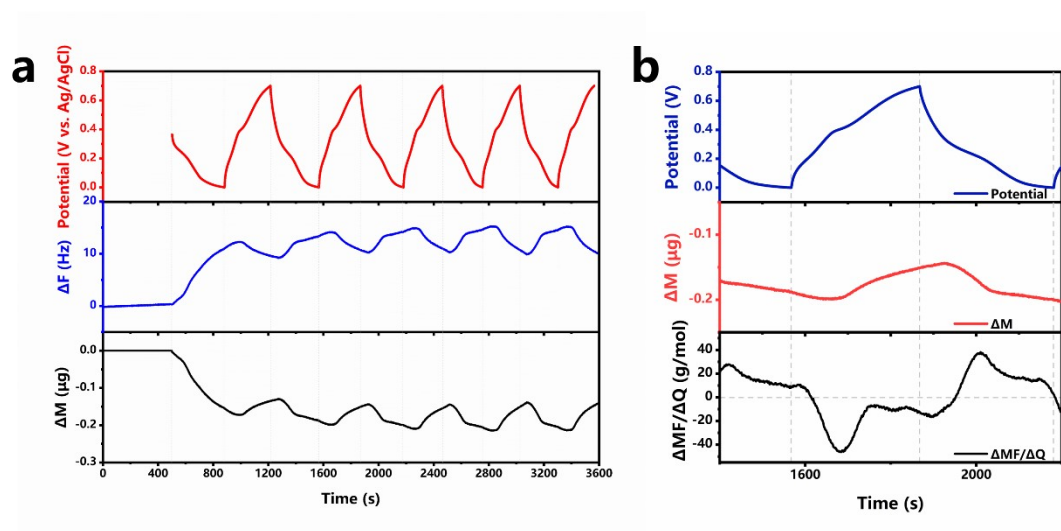

**Fig. S12** EQCM analyses of NS-KMnO-coated quartz electrode in 0.5 M  $\text{CH}_3\text{COOK}$  solution. (a) The changes of potential (red), frequency (blue), and Sauerbrey mass (black) in five cycles; (b) The changes of potential (blue), Sauerbrey mass (red), and mass gain or loss rate (black) between the second charge and third discharge. There is anion migration during charging and discharging.

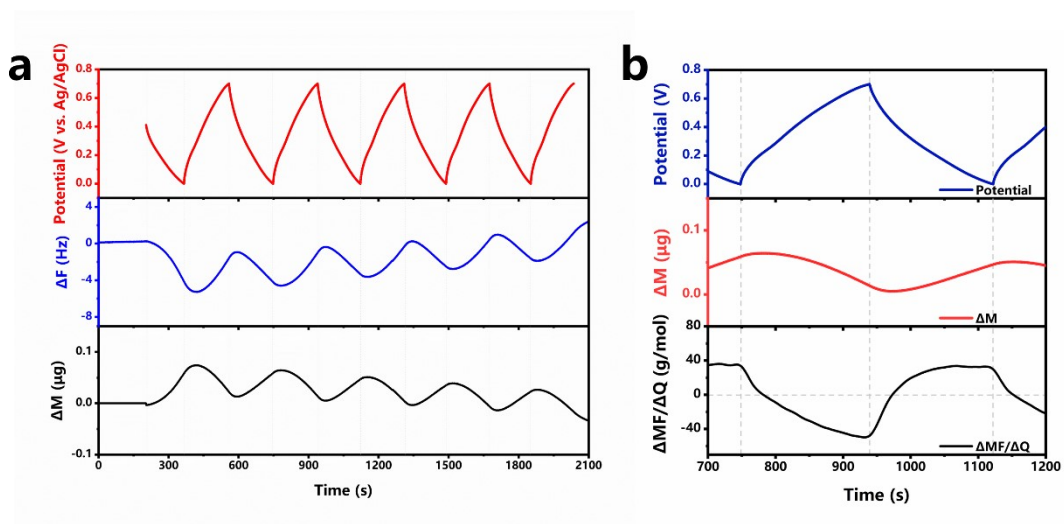

**Fig. S13** EQCM analyses of NS-KMnO-coated quartz electrode in 0.5 M KCl solution. (a) The changes of potential (red), frequency (blue), and Sauerbrey mass (black) in five cycles; (b) The changes of potential (blue), Sauerbrey mass (red), and mass gain or loss rate (black) between the second charge and third discharge. There is cation migration during charging and discharging.



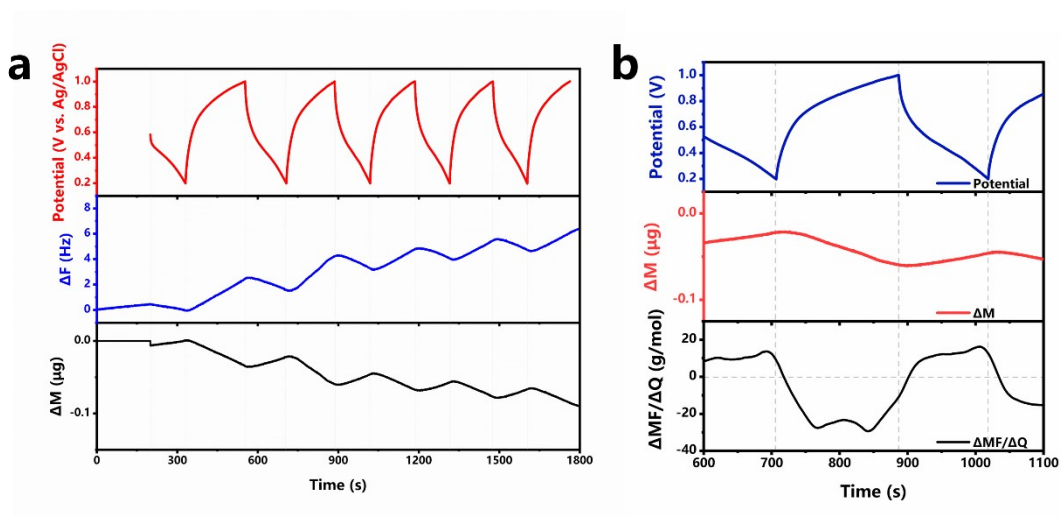

**Fig. S14** EQCM analyses of NS-KMnO-coated quartz electrode in 0.5 M KF solution. (a) The changes of potential (red), frequency (blue), and Sauerbrey mass (black) in five cycles; (b) The changes of potential (blue), Sauerbrey mass (red), and mass gain or loss rate (black) between the second charge and third discharge. There is cation migration during charging and discharging.

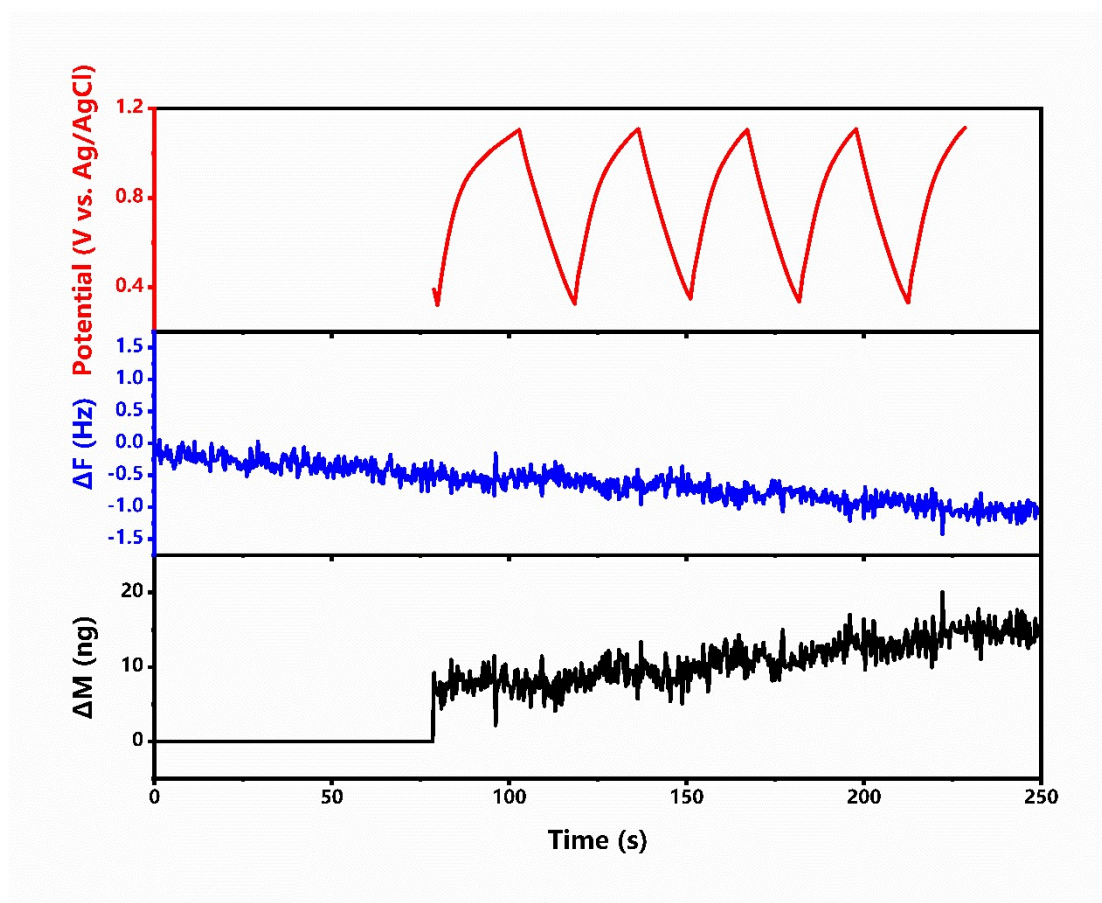

**Fig. S15** EQCM analyses of bare quartz electrode in 0.5 M  $\text{K}_2\text{SO}_4$  solution. The changes of potential (red line), frequency (blue line), and Sauerbrey mass (black line) in five cycles are similar, and there are ng-level Sauerbrey mass fluctuations.

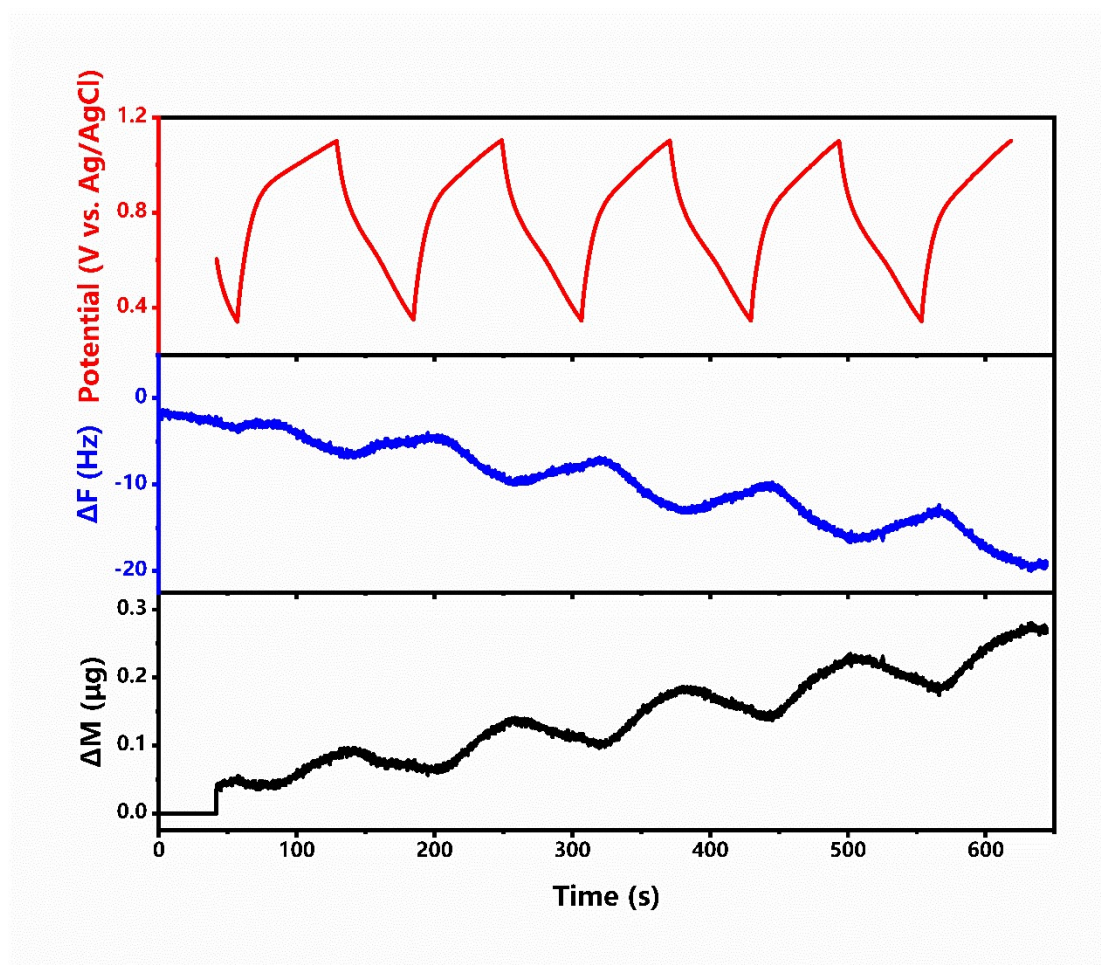

**Fig. S16** EQCM analyses of Bulk-KMnO-coated quartz electrode in 0.5 M  $\text{K}_2\text{SO}_4$  solution. The changes of potential (red line), frequency (blue line), and Sauerbrey mass (black line) in five cycles are similar. A huge Sauerbrey mass change was shown during the CC tests, indicting a low cycle stability.

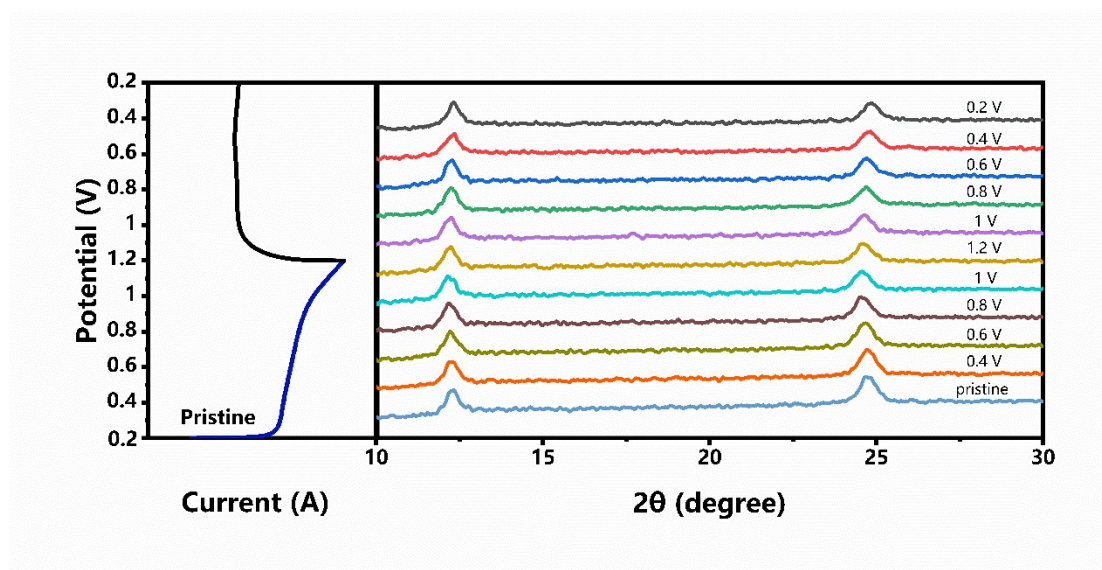

**Fig. S17** In-situ XRD date. CV curves of NS-KMnO<sub>4</sub>//YP-50 device at the scan rate of 2 mV s<sup>-1</sup> (left), corresponding in-situ XRD patterns at different potentials (right).

**Table S1** Part of equivalent circuit component fitting value.

| materials | $R_s (\Omega)$ | $C_{dl} (mF)$ | $R_{ct} (\Omega)$ | $W_o (\Omega^{-1} s^{0.5})$ | $C_l (mF)$           |
|-----------|----------------|---------------|-------------------|-----------------------------|----------------------|
| NS-KMnO   | 1.73           | 3.41          | 1.95              | 0.252                       | 431                  |
| Bulk-KMnO | 2.58           | 1.06          | 4.93              | 0.0294                      | $1.7 \times 10^{-5}$ |

## References

1. Y. Shao, M. F. El-Kady, J. Sun, Y. Li, Q. Zhang, M. Zhu, H. Wang, B. Dunn and R. B. Kaner, *Chem Rev*, 2018, **118**, 9233-9280.
2. G. Sauerbrey, *Physics*, 1959, **155**, 206-222.
